# Supplementary material
Source: PubMed Central journal article supplement (PMC3416208)
Supplement: JB.00783-12_zjb999091795so1.pdf [file JB.00783-12_zjb999091795so1.pdf]

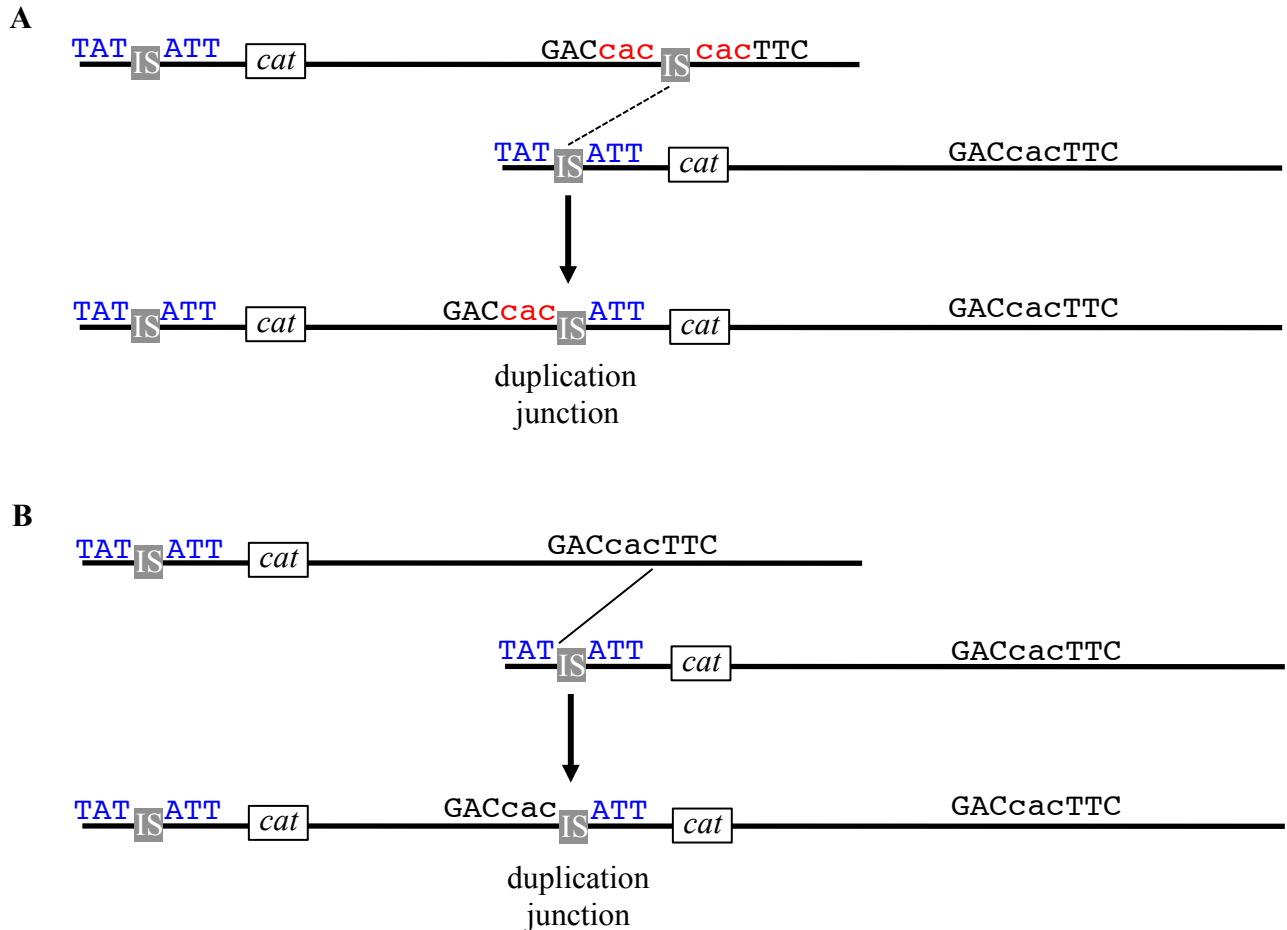

**FIG S2. Transposition and 3-bp flanking repeats: different models of duplication predict the same chromosomal configuration in ACN1039-derived mutants.** The bottom line of each panel represents the chromosome of an ACN1039-derived Ben<sup>+</sup> amplification mutant. Two models are illustrated for the formation of the mutant (corresponding to the models in Fig. 3B and 3C). In panel A (and Fig. 3C), an IS1236 element transposes on one copy of the chromosome and then undergoes unequal homologous recombination with a sister chromosome. In panel B (and Fig. 3B), duplication involves illegitimate recombination without transposition. The lowercase typeface (cac) indicates the sequence that was identified immediately upstream of the IS element in the duplication junction of mutant ACN1223. In panel A, this sequence corresponds the 3-bp transposition target that typically becomes duplicated during the transposition of IS1236 (red text). The absence of direct repeats flanking IS1236\_3 (blue text) may reflect sequence divergence that occurred after an ancient insertion. In the model shown in panel B, this lowercase sequence corresponds to the sequence downstream of the *cat* genes that undergoes illegitimate recombination with the end of IS1236\_3. As shown by the bottom line of both panels, the resulting chromosomal sequence of the mutant (ACN1223) is the same whether it is generated by homologous recombination between two IS elements (dashed line, panel A) or by illegitimate recombination (thin solid line, panel B). Thus, efforts to identify 3-bp flanking repeats are unable to distinguish between different models of duplication (A and B).

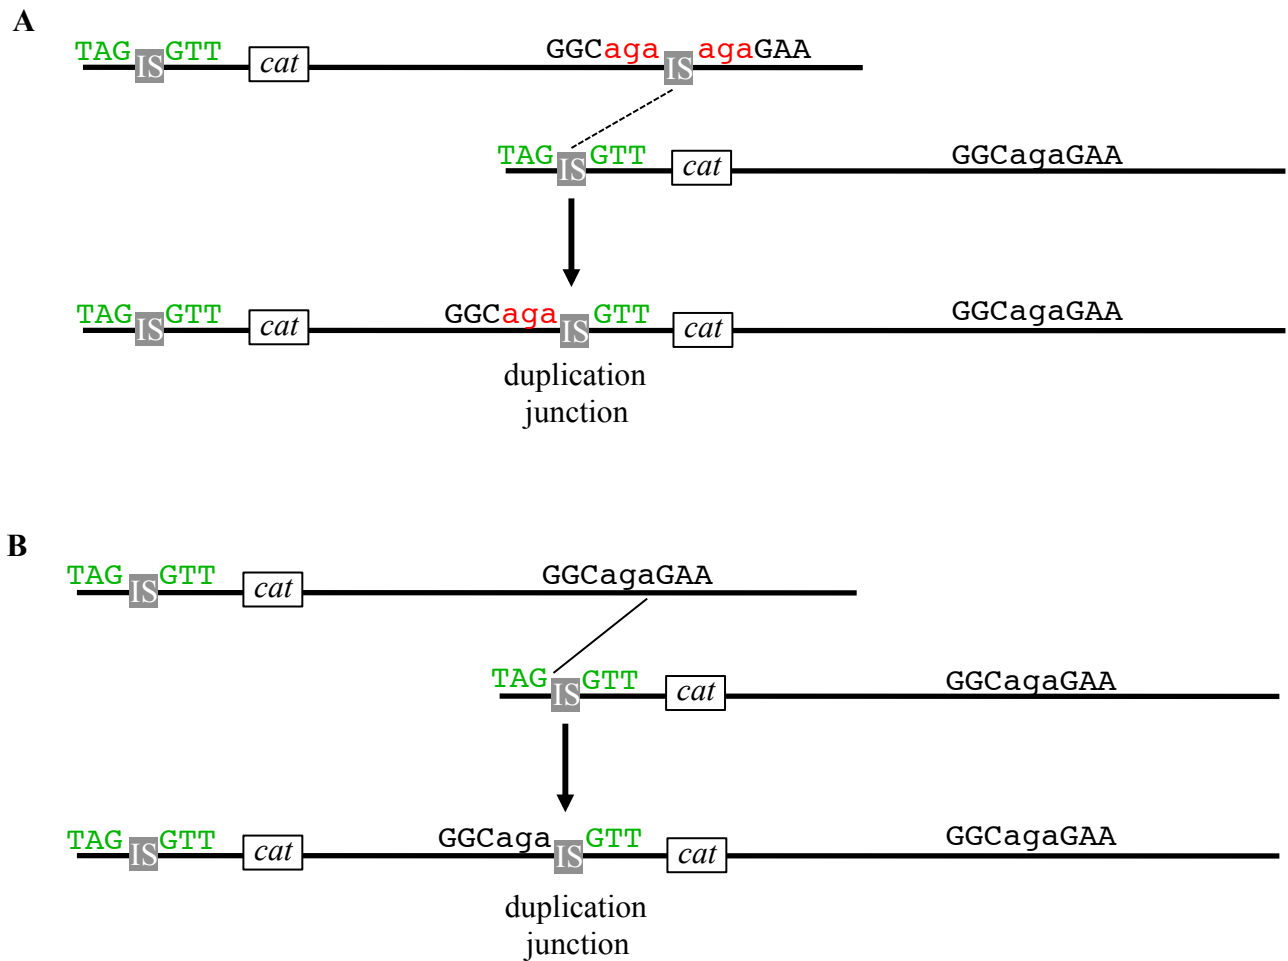

**FIG S3. Transposition and 3-bp flanking repeats: different models of duplication predict the same chromosomal configuration in ACN1050-derived mutants.** The bottom line of each panel represents the chromosome of an ACN1050-derived Ben<sup>+</sup> amplification mutant. Two models are illustrated for the formation of the mutant (corresponding to the models in Fig. 3B and 3C). In panel A (and Fig. 3C), an IS1236 element transposes on one copy of the chromosome and then undergoes unequal homologous recombination with a sister chromosome. In panel B (and Fig. 3B), duplication involves illegitimate recombination without transposition. The lowercase typeface (aga) indicates the sequence that was identified immediately upstream of the IS element in the duplication junction of mutant ACN1056. In panel A, this sequence corresponds the 3-bp transposition target that typically becomes duplicated during the transposition of IS1236 (red text). The absence of direct repeats flanking IS1236\_6 (green text) may reflect sequence divergence that occurred after an ancient insertion. In the model shown in panel B, this lowercase sequence corresponds to the sequence downstream of the *cat* genes that undergoes illegitimate recombination with the end of IS1236\_6. As shown by the bottom line of both panels, the resulting chromosomal sequence of the mutant (ACN1056) is the same whether it is generated by homologous recombination between two IS elements (dashed line, panel A) or by illegitimate recombination (thin solid line, panel B). Thus, efforts to identify 3-bp flanking repeats are unable to distinguish between different models of duplication (A and B).

| <b>Table S1. Primer Sequences</b>                                   |                                    |                                    |
|---------------------------------------------------------------------|------------------------------------|------------------------------------|
| Primer Name                                                         | Sequence                           | Strain                             |
| <b>PCR analysis (Fig. 6 and Table 2)</b>                            |                                    |                                    |
| 2783029_UP                                                          | CGCGCATCATCTACCGTACAGTCG           | ACN1056, ACN1057, ACN1161, ACN1163 |
| 2783847_DN                                                          | GGCAAGTGTATAAGAAATCGTAGC           | ACN1056, ACN1057, ACN1161, ACN1163 |
| 2781256_UP                                                          | GATCTGATCACCTCTCAAAGC              | ACN1058                            |
| 2782115_DN                                                          | GTAGAATGGGTTCGAGTCAGCAGATG         | ACN1058                            |
| 980893_UP                                                           | GGGATTGCAGATTTGGTTCGGG             | ACN1040, ACN1140                   |
| 981637_DN                                                           | CAAAGCGACGTTTCCATTGAGCCG           | ACN1040, ACN1140                   |
| 976931_UP                                                           | GAAGAGTGGCAACCGCGTGTAGAAG          | ACN1101                            |
| 977672_DN                                                           | CTTTGTGCCTTGCTGCTCATG              | ACN1101                            |
| 992475_UP                                                           | GGATTAGGATTGATATTGCTTGTGG          | ACN1102, ACN1131                   |
| 993492_DN                                                           | CATACCTGCGACTCTCCTTGGCG            | ACN1102, ACN1131                   |
| 2784210_UP                                                          | CAGGCCATGTGGTTCGCGCTG              | ACN1105                            |
| 2785055_DN                                                          | GTAGTAGGGTTTTGTTACTAGGATCTGTG      | ACN1105                            |
| 2762759_UP                                                          | GCATGCTGGTTTTGAAGTAAGGCC           | ACN1106                            |
| 2763624_DN                                                          | CTGAATTGTTGTACTTGAGTGTGG           | ACN1106                            |
| 970003_UP                                                           | GATGGCTGGATTCAATTTGATGGG           | ACN1127                            |
| 970819_DN                                                           | GGTCATAAAGCGTAACCCATTC             | ACN1127                            |
| 973132_UP                                                           | CCTTACGCAAATATCCGCAAG              | ACN1128                            |
| 974099_DN                                                           | GTCCTGCTCATACACCGTTGG              | ACN1128                            |
| 983351_UP                                                           | CACATATCGCAGCAGATAAATTG            | ACN1130                            |
| 984231_DN                                                           | CATGGGCTTCAAGTAAACGGGC             | ACN1130                            |
| 988993_UP                                                           | GGGAATATCTAATGCAAAGCGATG           | ACN1141                            |
| 989788_DN                                                           | GATGCCATCATTACCCAAGATACC           | ACN1141                            |
| 975336_UP                                                           | GACCATTACATACATTACTGCACGG          | ACN1222                            |
| 976218_DN                                                           | GCTTCACTGATATCGGAGGGTTG            | ACN1222                            |
| 971804_UP                                                           | TCCGCACCCACTACAACATCA              | ACN1223                            |
| 972916_DN                                                           | GGAACGCGCTGGCCTGCACATG             | ACN1223                            |
| <b>DIG-labeling for Southern hybridization (Fig. 7 and Table 3)</b> |                                    |                                    |
| 2782954_UP                                                          | GCAGACAAACACTCGGTATGCGTTAC         | ACN1056, ACN1057                   |
| 2783350_DN                                                          | CTGCCAGCAGTAAATTAATTCATGG          | ACN1056, ACN1057                   |
| 2781264_UP                                                          | CACCTCTCAAAGCAAAGATCAATGG          | ACN1058                            |
| 2781669_DN                                                          | CTGTTGAGAGGGAATATCGTTAACTAAAC      | ACN1058                            |
| 977090_UP                                                           | CGGTGCAGGTCAGGCCGCGAG              | ACN1101                            |
| 977490_DN                                                           | CCAGTAAATTCGCCAAACGTTTCGC          | ACN1101                            |
| <b>Southern Size Standards (Fig. 7 and Table 3)</b>                 |                                    |                                    |
| 2782954_UP                                                          | GCAGACAAACACTCGGTATGCGTTAC         | ACN1056, ACN1057                   |
| 2784779_DN                                                          | AGGCATTAATGAAGTCATTCCATAATG        | ACN1056, ACN1057                   |
| 2786049_DN                                                          | GAAAAAAAAACAATAGTGAATTTTGCGAATATGC | ACN1056, ACN1057                   |
| 2787539_DN                                                          | TCACTGTTTCTACACCAGATTGAATTTTG      | ACN1056                            |
| 2787602_DN                                                          | CACCTTCGCCTGTAAATACATAATCAGC       | ACN1057                            |
| 2782750_UP                                                          | GCATGGTTATCCTCATAAAGTTTCGC         | ACN1057                            |
| 2781188_UP                                                          | CTATTGGTTATGTCCCAACTTACGAAG        | ACN1058                            |
| 2781264_UP                                                          | CACCTCTCAAAGCAAAGATCAATGG          | ACN1058                            |
| 2783861_DN                                                          | TGATTTACACGCGCGCAAGTGTATAAG        | ACN1058                            |
| 2786690_DN                                                          | AATAAATGTGAAGGGGAATCAGTTTTAATC     | ACN1058                            |
| 2785055_DN                                                          | GTAGTAGGGTTTTGTTACTAGGATCTGTG      | ACN1058                            |
| 966684_UP                                                           | TTCGGTAAAAATCTTGCCTTG              | ACN1101                            |
| 974759_UP                                                           | CAATATGCAATTGATAATGTCATG           | ACN1101                            |
| 975990_UP                                                           | GCAACATCCACAGGATTTAAACG            | ACN1101                            |
| 977490_DN                                                           | CCAGTAAATTCGCCAAACGTTTCGC          | ACN1101                            |

**Table S2.** Amplicon Analysis of Ben<sup>+</sup> Mutants

| Parent strain | GDA mutant | Amplicon size (kbp) | Amplicon Copy Number | Amount of amplified DNA (kbp) <sup>a</sup> | IS-mediated? |
|---------------|------------|---------------------|----------------------|--------------------------------------------|--------------|
| ACN1039       | ACN1040    | 49                  | 9                    | 444                                        | Yes          |
| ACN1039       | ACN1101    | 46                  | 15                   | 681                                        | Yes          |
| ACN1039       | ACN1102    | 61                  | 19                   | 1138                                       | Yes          |
| ACN1039       | ACN1127    | 39                  | 31                   | 1213                                       | Yes          |
| ACN1039       | ACN1128    | 42                  | 20                   | 852                                        | Yes          |
| ACN1039       | ACN1130    | 52                  | 35                   | 1826                                       | Yes          |
| ACN1039       | ACN1131    | 61                  | 27                   | 1619                                       | Yes          |
| ACN1039       | ACN1140    | 50                  | 14                   | 705                                        | Yes          |
| ACN1039       | ACN1141    | 58                  | 12                   | 684                                        | Yes          |
| ACN1039       | ACN1222    | 44                  | 23                   | 1012                                       | Yes          |
| ACN1039       | ACN1223    | 41                  | 2                    | 82                                         | Yes          |
| ACN1050       | ACN1056    | 69                  | 7                    | 507                                        | Yes          |
| ACN1050       | ACN1057    | 69                  | 9                    | 595                                        | Yes          |
| ACN1050       | ACN1058    | 67                  | 8                    | 545                                        | Yes          |
| ACN1050       | ACN1105    | 70                  | 6                    | 402                                        | Yes          |
| ACN1050       | ACN1106    | 49                  | 10                   | 473                                        | Yes          |
| ACN1050       | ACN1161    | 69                  | 26                   | 1768                                       | Yes          |
| ACN1050       | ACN1162    | 60                  | 6                    | 351                                        | No           |
| ACN1050       | ACN1163    | 69                  | 16                   | 1105                                       | Yes          |
| ACN1050       | ACN1164    | 78                  | 16                   | 1242                                       | No           |
| ACN1050       | ACN1165    | 95                  | 17                   | 1606                                       | No           |

<sup>a</sup>Amount of amplified DNA is inferred from amplicon size and copy number. If the product of the listed amplicon size and its copy number differs from the listed amount of DNA, the discrepancy arises from rounding.
